# Supplementary figures and images for: Decline of Affective Prosody Recognition with a Positivity Bias among Older Adults: A Systematic Review and Meta-analysis
Source: Preprints.org preprint supplement (doi:10.20944/preprints202312.1643.v1), 2023-12-21

Contour-Enhanced Funnel Plot (Affective Prosody Recognition in Older Adults)

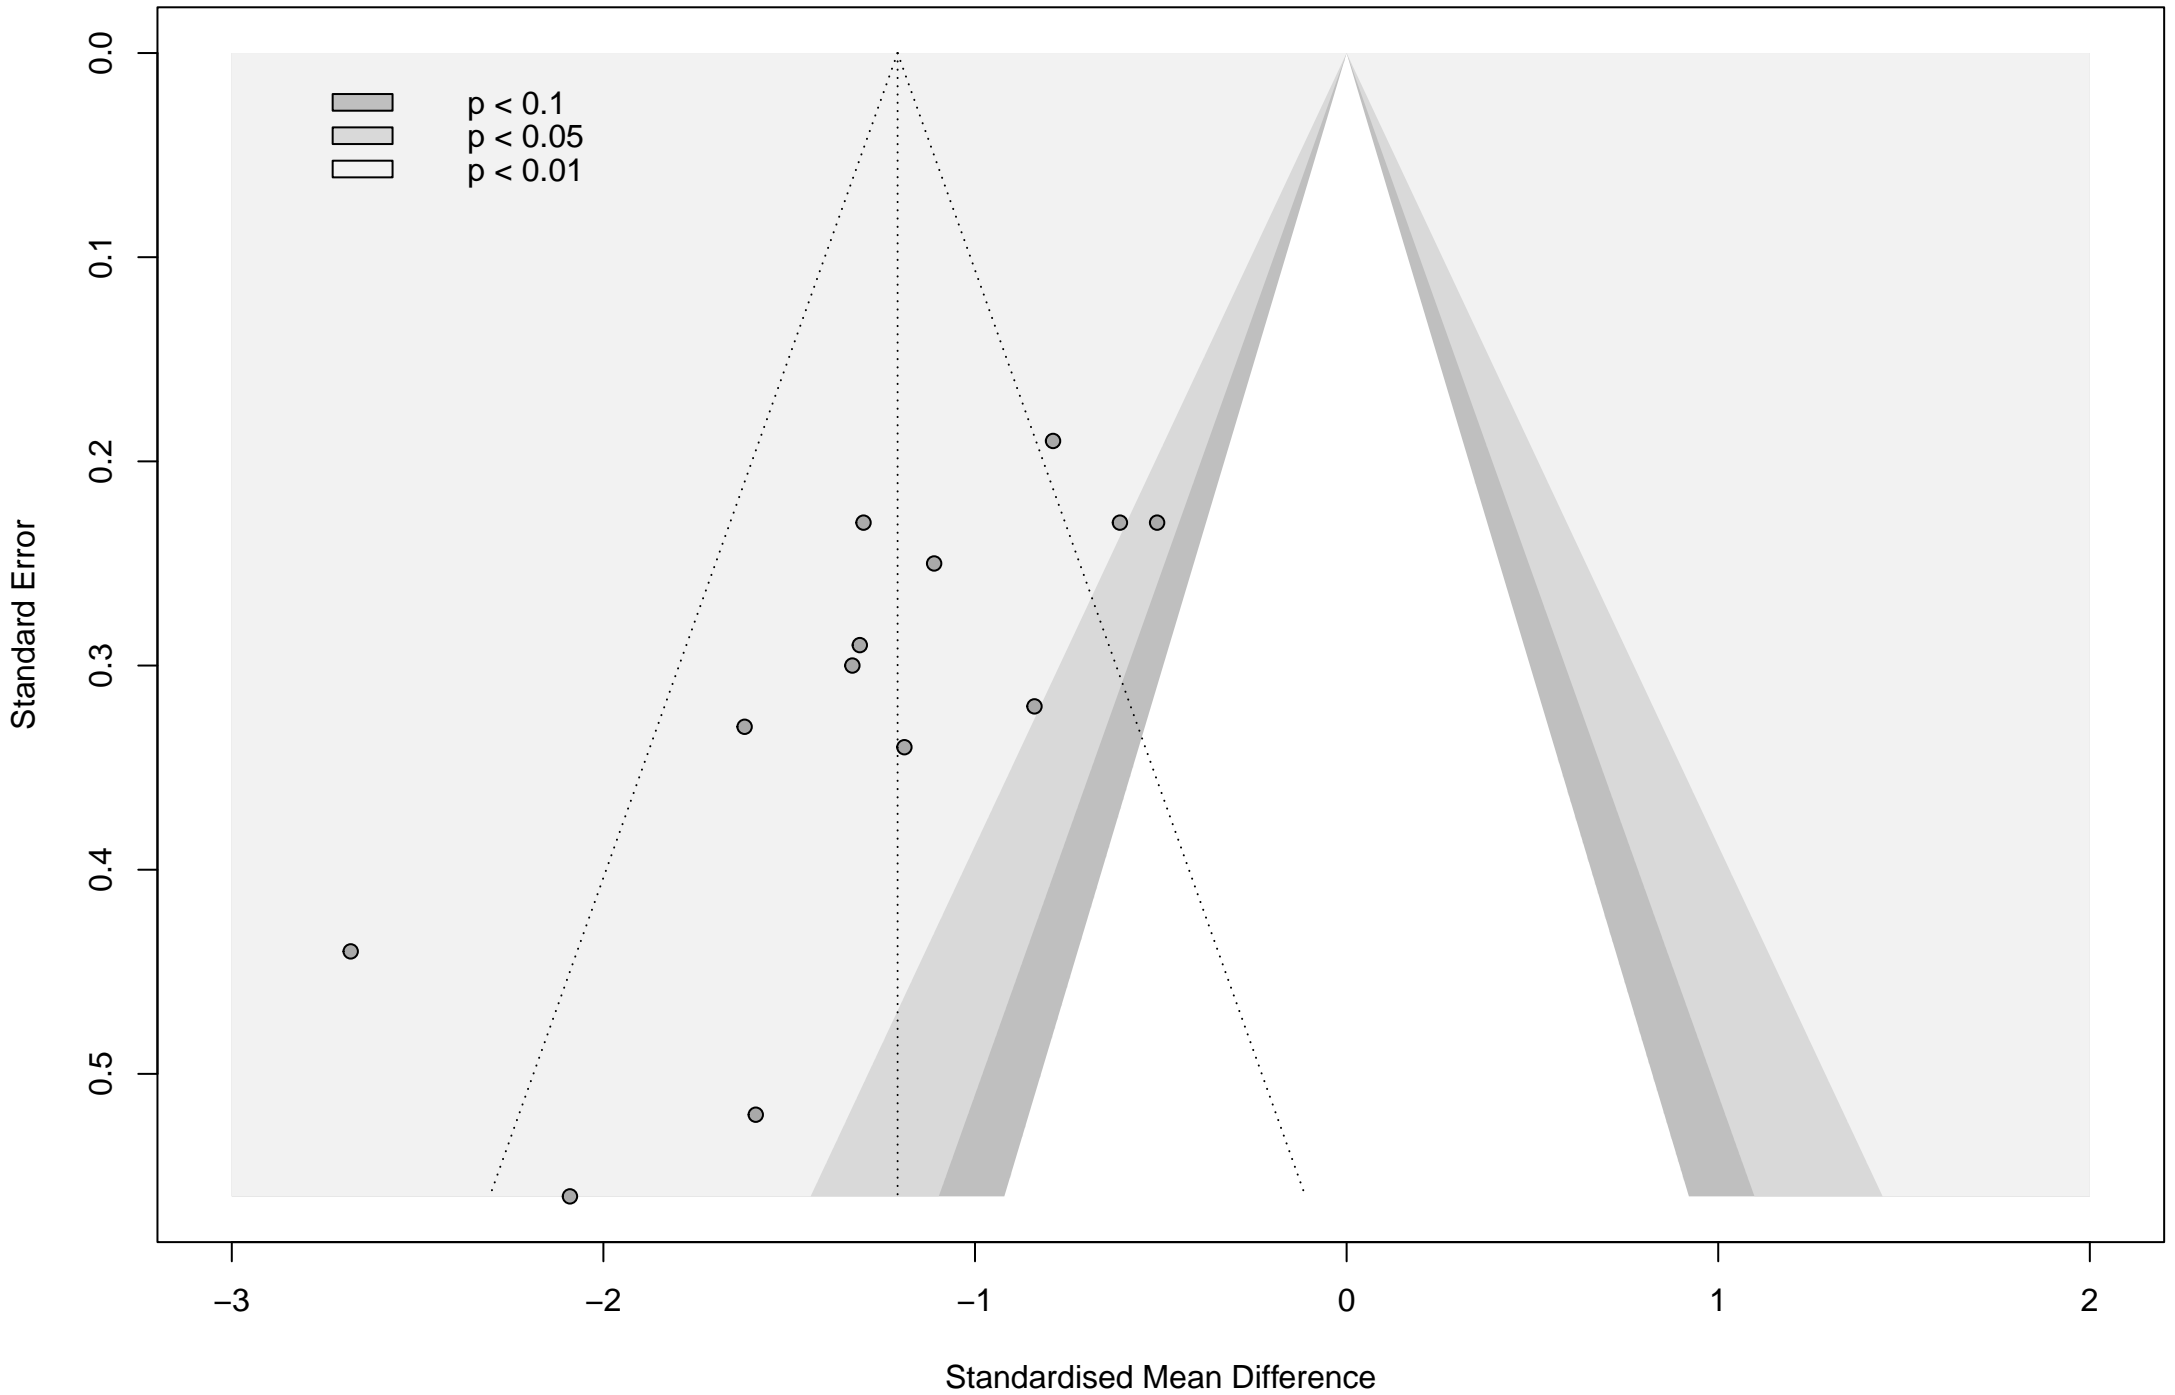

Supplement: Supplementary file 1 [file supplementary]

Sorted by  $I^2$

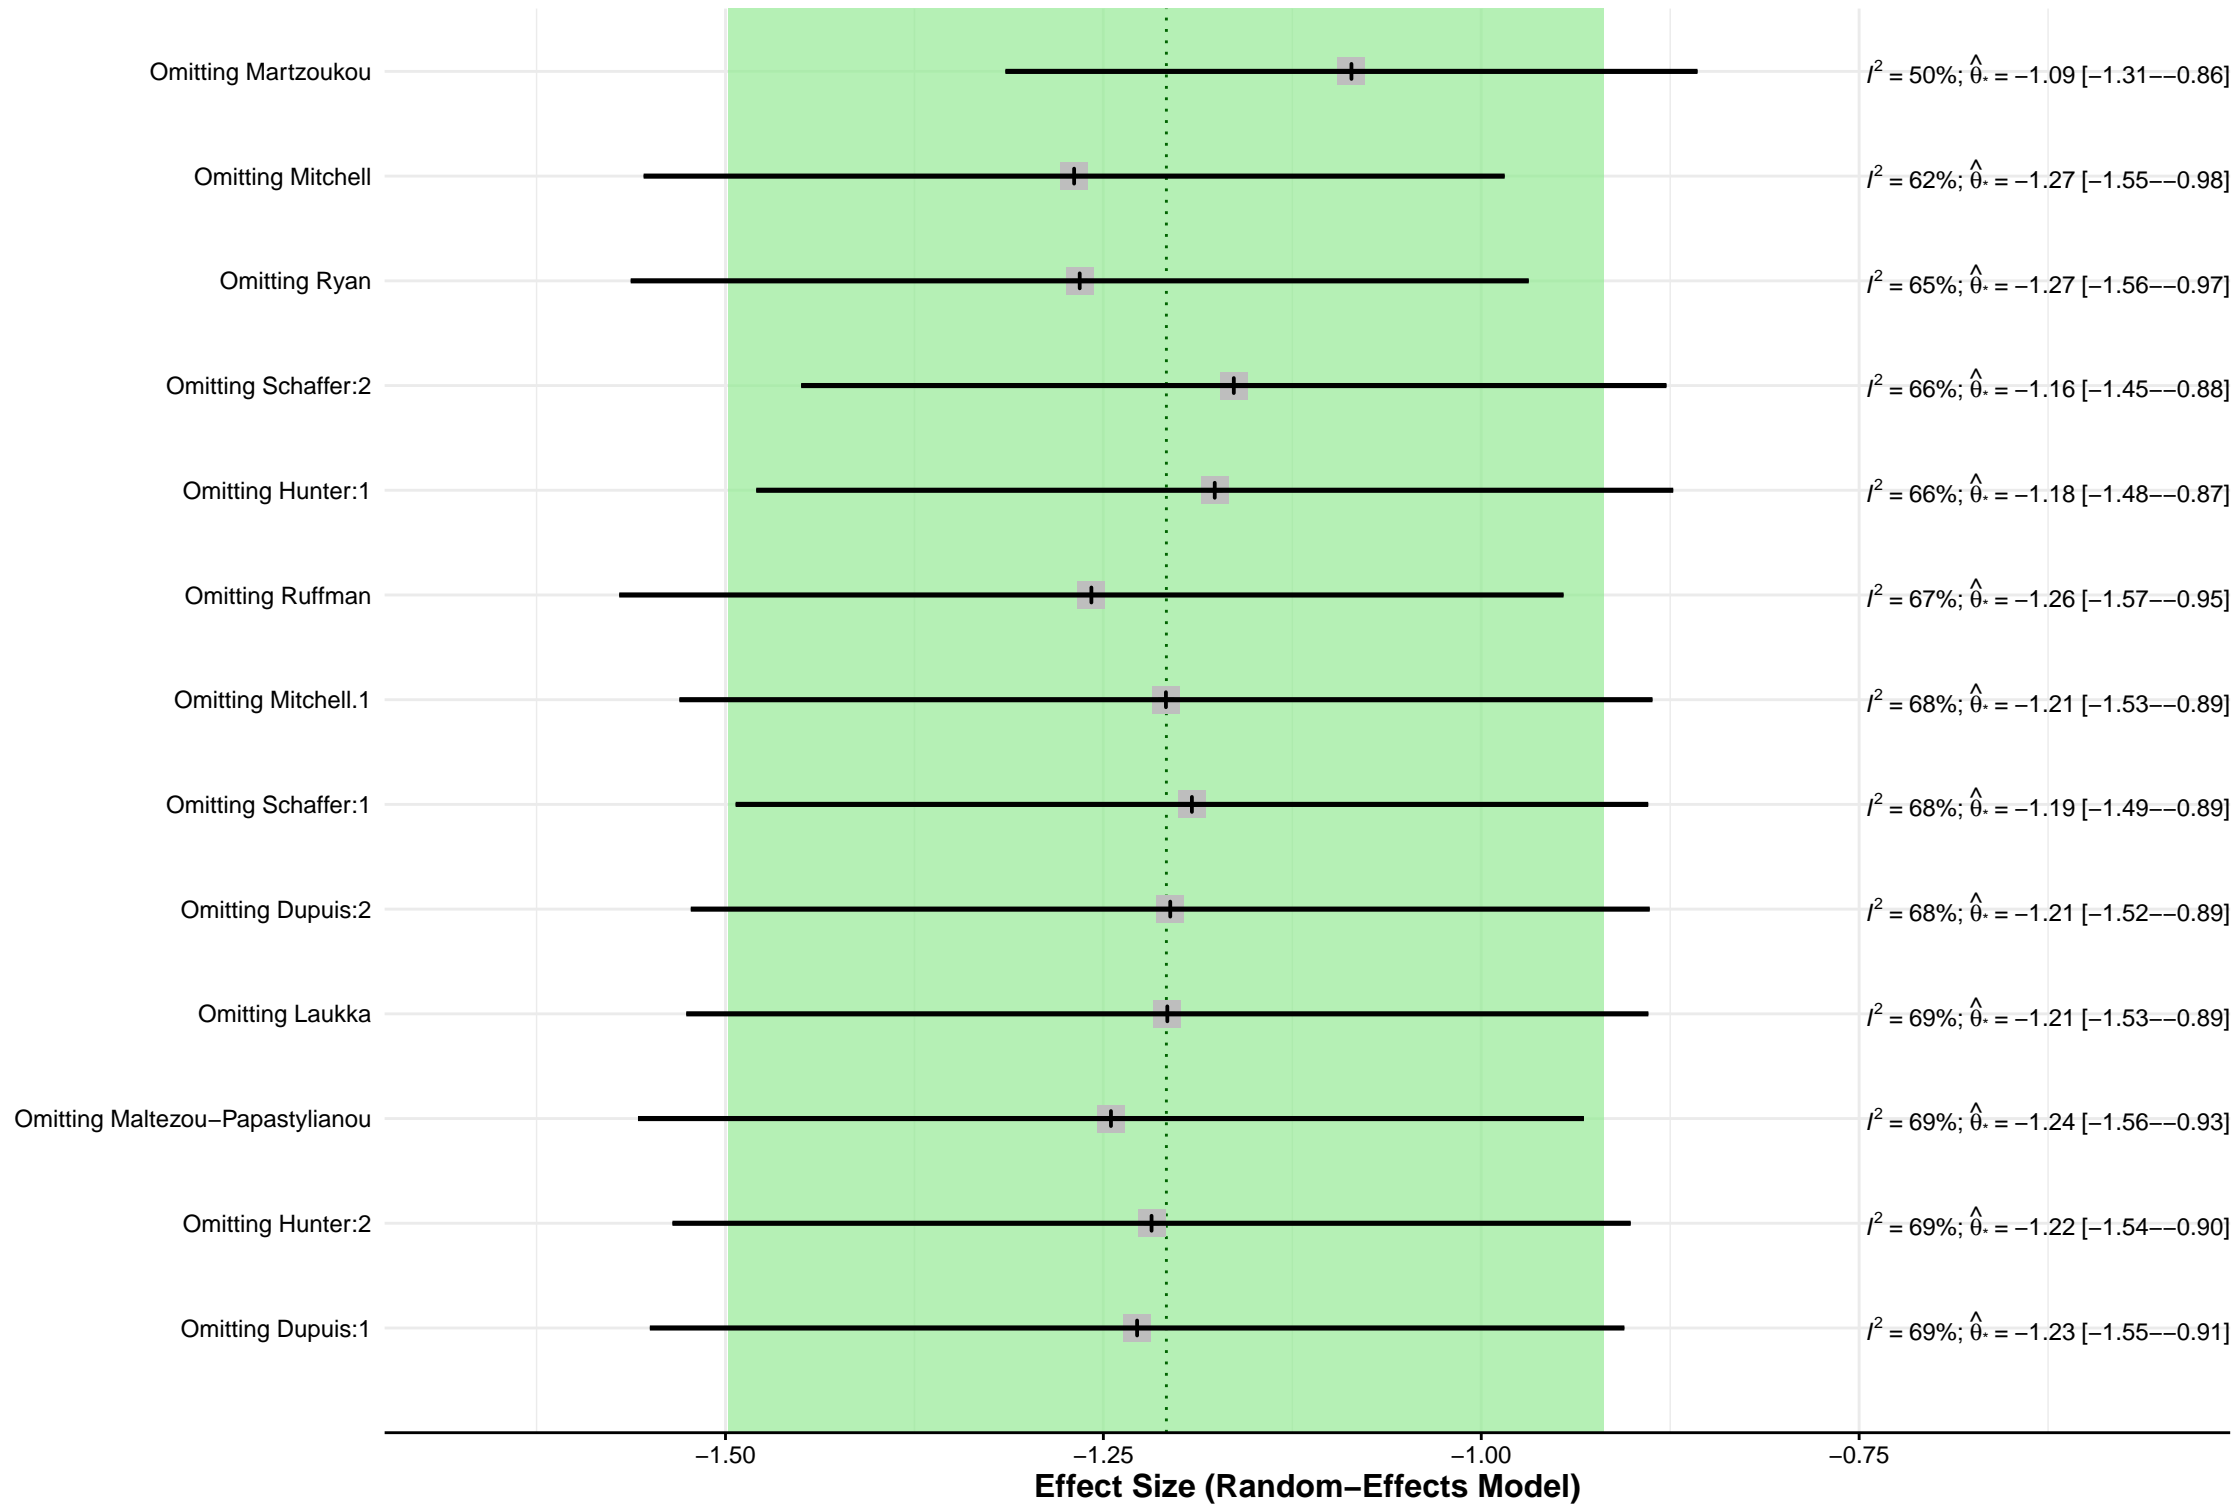

Supplement: Supplementary file 2 [file supplementary]

**Funnel Plot (Trim & Fill Method)**

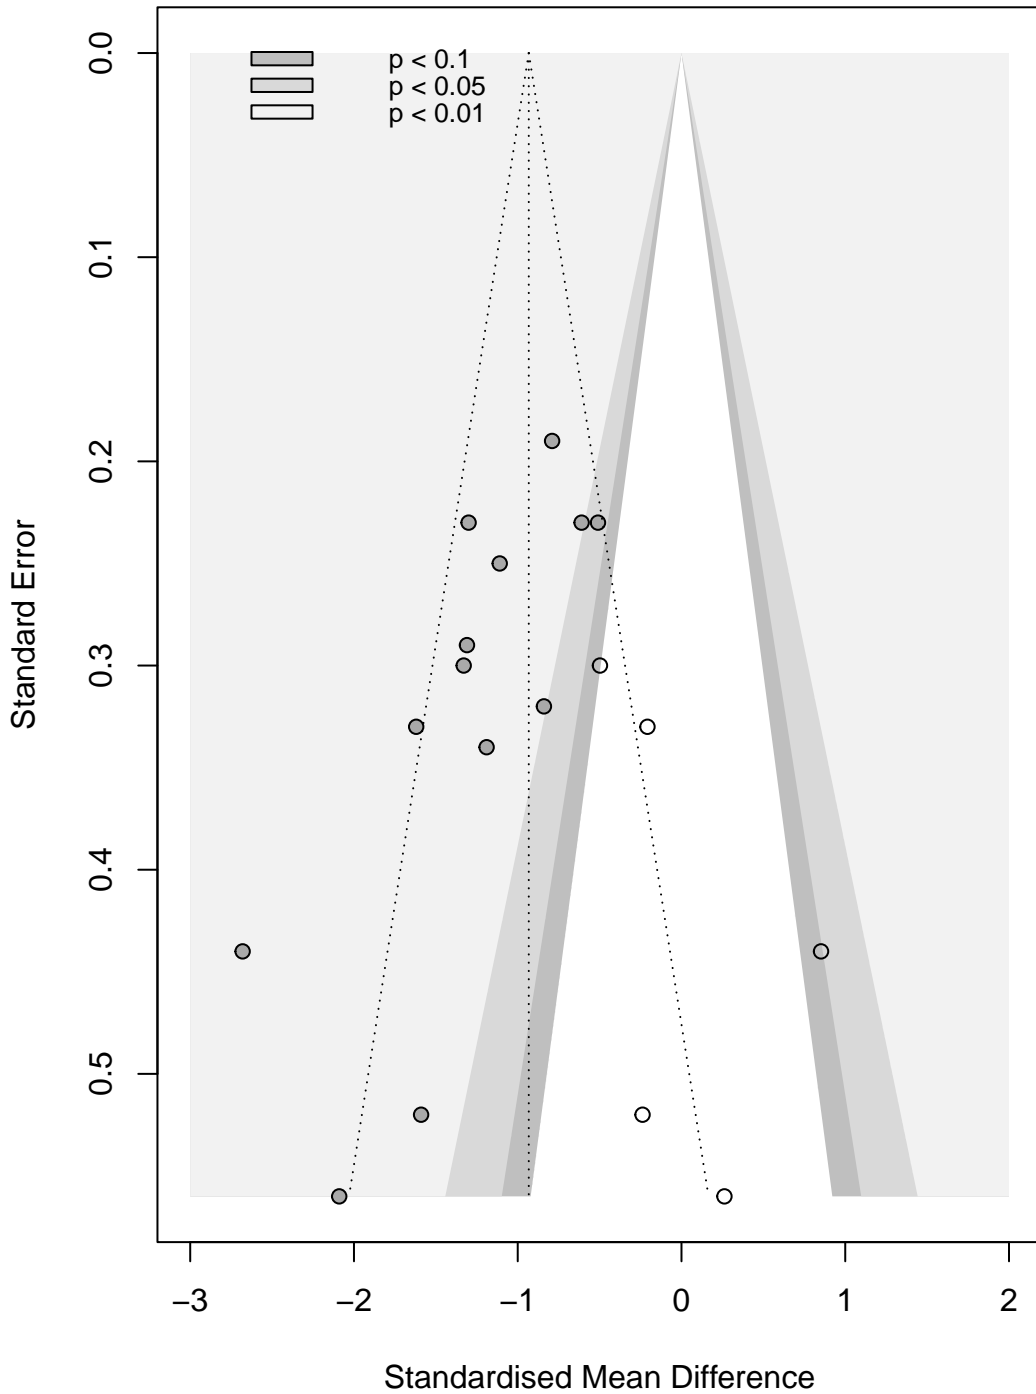

**Funnel Plot (Trim & Fill Method) – Outliers Removed**

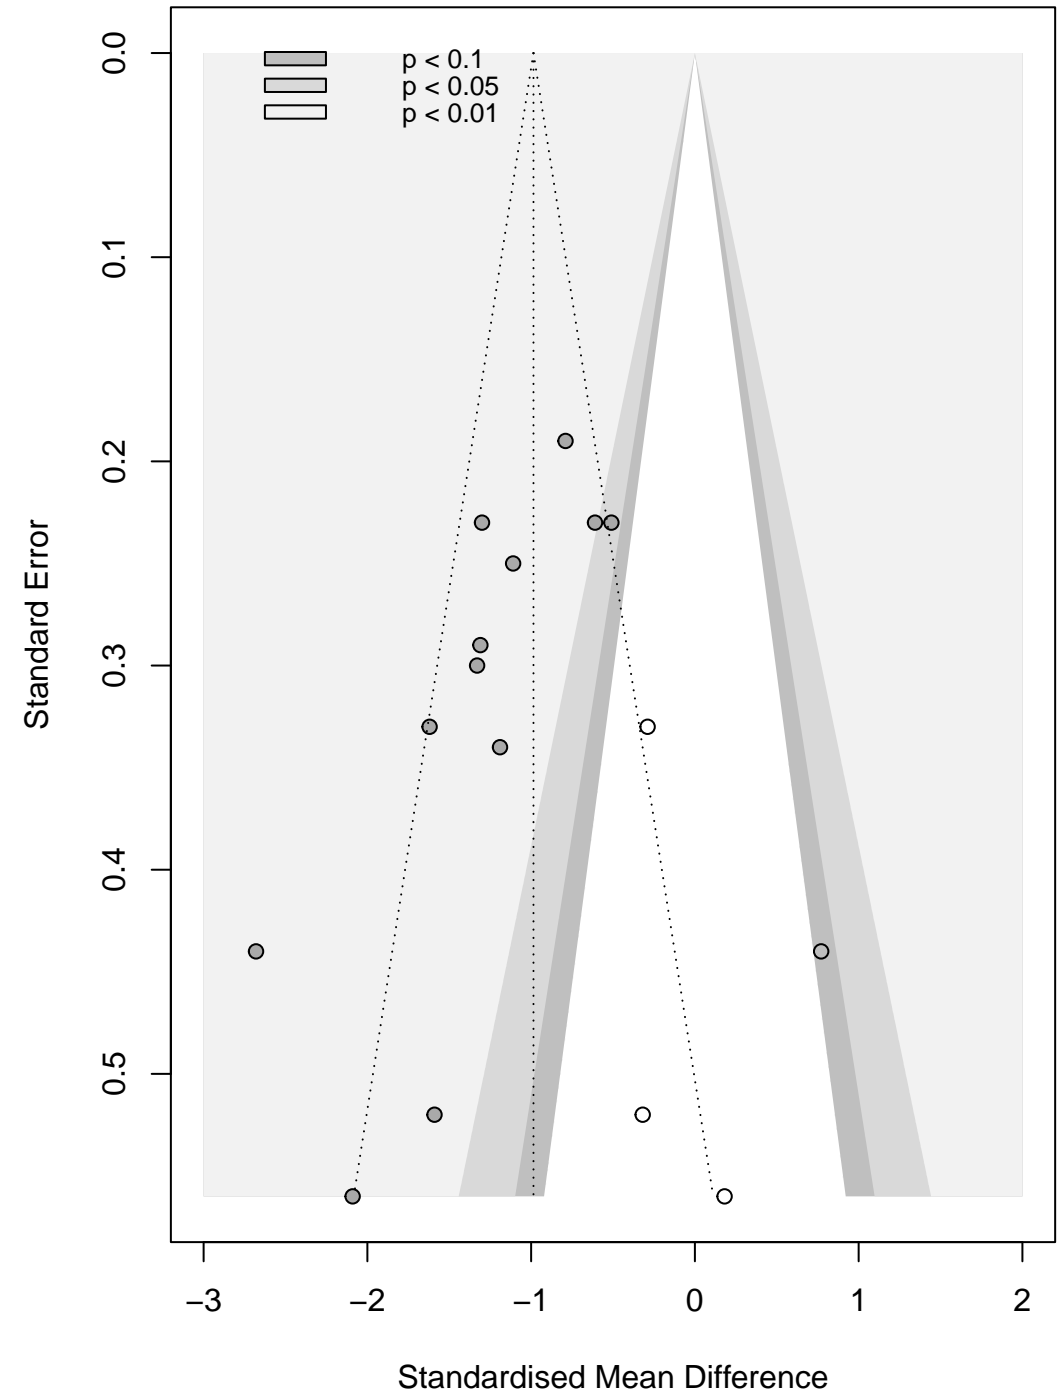

Supplement: Supplementary file 3 [file supplementary]
